# Supplementary material for: Feed and Host Genetics Drive Microbiome Diversity with Resultant Consequences for Production Traits in Mass-Reared Black Soldier Fly (Hermetia illucens) Larvae
Source: Insects. 2021 Dec 1;12(12):1082. doi: 10.3390/insects12121082 (PMC8706267; doi:10.3390/insects12121082)
Supplement: Supplementary file 1 [file insects-12-01082-s001.zip]

Archive with 11 entries (11 files):
- Suppl Files/Figure S1.pdf
- Suppl Files/Figure S2.pdf
- Suppl Files/Figure S3.pdf
- Suppl Files/Figure S4.pdf
- Suppl Files/Figure S5.pdf
- Suppl Files/Table S1.xlsx
- Suppl Files/Table S2.xlsx
- Suppl Files/Table S3.xlsx
- Suppl Files/Table S4.xlsx
- Suppl Files/Table S5.xlsx
- Suppl Files/Table S6.xlsx
