# Supplementary material for: Feed and Host Genetics Drive Microbiome Diversity with Resultant Consequences for Production Traits in Mass-Reared Black Soldier Fly (Hermetia illucens) Larvae
Source: Insects. 2021 Dec 1;12(12):1082. doi: 10.3390/insects12121082 (PMC8706267; doi:10.3390/insects12121082)
Supplement: Supplementary file 1 [file insects-12-01082-s001.zip › Suppl Files/Table S1.xlsx]

## Sheet: Table S1
Table S1. Read generation, retention and mapping statistics for the larvae 16S metagenomic library.
Sample	Total Reads	Valid Reads	Reads Excluded (n <10)	Mapped Reads	Unmapped Reads	Genus-level Mapped Reads
FM1-L	602701	480475	149278	319585	11612	205953
FM2-L	604309	484998	136160	347774	1064	186931
FM3-L	578003	456255	151529	304381	345	187109
FO1-L	572631	456848	112773	319557	24518	242718
FO2-L	697191	562482	143866	418616	0	217928
FO3-L	678112	550205	163293	286912	0	239895
FS1-L	641505	520780	146327	357591	16862	169324
FS2-L	503780	405320	123106	276971	5243	129612
FS3-L	704474	576565	161867	413955	743	235135
FX1-L	553274	435578	131418	303901	259	178633
FX2-L	678407	543416	169435	373981	0	213676
FX3-L	642008	520769	144624	361886	14259	146909
WM1-L	573362	461175	145259	315874	42	187887
WM2-L	639382	517939	154119	344782	19038	154148
WM3-L	643740	526483	138361	388122	0	213151
WO1-L	655321	538993	151664	385437	1892	276778
WO2-L	681649	543885	94116	449769	0	271603
WO3-L	593271	493176	134780	358396	0	264178
WS1-L	603350	485200	150460	331036	3704	185962
WS2-L	735256	593004	177367	415325	312	195573
WS3-L	665649	528601	163636	364791	174	175054
WX1-L	564817	447855	96813	323949	27093	228335
WX2-L	518075	414976	130099	269165	15712	214179
WX3-L	571295	455541	139555	315986	0	221003
Total	14901562	12000519	3409905	8347742	142872	4941674
Samples are alphanumerically encoded. F – Factory; W – Wild; M – Formulated; O – Organic; S – Sterile; X – Brewer’s. Sample numbers refer to each pooled experimental replicate.
