# Supplementary material for: Feed and Host Genetics Drive Microbiome Diversity with Resultant Consequences for Production Traits in Mass-Reared Black Soldier Fly (Hermetia illucens) Larvae
Source: Insects. 2021 Dec 1;12(12):1082. doi: 10.3390/insects12121082 (PMC8706267; doi:10.3390/insects12121082)
Supplement: Supplementary file 1 [file insects-12-01082-s001.zip › Suppl Files/Table S2.xlsx]

## Sheet: Table S2
Table S2. Read generation, retention and mapping statistics for the feed 16S metagenomic library.
Sample	Total Reads	Valid Reads	Reads Excluded (n <10)	Mapped Reads	Unmapped Reads	Genus-level Mapped Reads
FM1-F	492851	375398	141714	224335	9349	163027
FM2-F	478952	362853	139974	219157	3722	166721
FM3-F	443786	338824	132146	195564	11114	142752
FO1-F	525124	403045	126266	269856	6923	215762
FO2-F	488859	378478	113207	265271	0	200889
FO3-F	508071	390326	115399	274927	0	204022
FS1-F	514055	389290	136152	229683	23455	136227
FS2-F	507449	383290	124421	250487	8382	164938
FS3-F	458300	350024	119751	228740	1533	171664
FX1-F	468501	346813	118463	205107	23243	149506
FX2-F	445110	332970	123785	209185	0	154279
FX3-F	450227	338739	124807	212791	1141	158372
WM1-F	540934	413625	161067	251274	1284	202492
WM2-F	508423	382872	149676	230268	2928	180266
WM3-F	459942	349720	136048	201316	12356	147231
WO1-F	480511	359383	116158	243052	173	196442
WO2-F	508414	388192	113342	274850	0	224088
WO3-F	459157	344496	109156	234276	1064	193665
WS1-F	548633	412333	134448	275301	2584	171212
WS2-F	472892	357482	124296	231453	1733	132933
WS3-F	522627	390415	137799	226195	26421	145981
WX1-F	601664	468492	131971	335629	892	294442
WX2-F	548648	434584	115341	319155	88	275854
WX3-F	552664	429780	123904	281251	24625	233612
Total	11985794	9121424	3069291	5889123	163010	4426377
Samples are alphanumerically encoded. F – Factory; W – Wild; M – Formulated; O – Organic; S – Sterile; X – Brewer’s. Sample numbers refer to each pooled experimental replicate.
