# Supplementary material for: Feed and Host Genetics Drive Microbiome Diversity with Resultant Consequences for Production Traits in Mass-Reared Black Soldier Fly (Hermetia illucens) Larvae
Source: Insects. 2021 Dec 1;12(12):1082. doi: 10.3390/insects12121082 (PMC8706267; doi:10.3390/insects12121082)
Supplement: Supplementary file 1 [file insects-12-01082-s001.zip › Suppl Files/Table S3.xlsx]

## Sheet: Table S3
Table S3. Pairwise differentiation in larval gut microbiome profiles is observed between feed groups.
Feed	Formulated	Sterile	Organic
Sterile	0.03	-	-
Organic	0.005	0.005	-
Brewer's	0.007	0.005	0.088
FDR-corrected P-values of a post-hoc PERMANOVA test (RVAideMemoire package; pairwise.perm.manova function; 999 permutations), run on genus-level Bray-Curtis distance matrix stratified by larval diet, are displayed. Statistical significance is considered at an α = 0.05 threshold.
