# Supplementary material for: Feed and Host Genetics Drive Microbiome Diversity with Resultant Consequences for Production Traits in Mass-Reared Black Soldier Fly (Hermetia illucens) Larvae
Source: Insects. 2021 Dec 1;12(12):1082. doi: 10.3390/insects12121082 (PMC8706267; doi:10.3390/insects12121082)
Supplement: Supplementary file 1 [file insects-12-01082-s001.zip › Suppl Files/Table S4.xlsx]

## Sheet: Table S4
Table S4. Prevalent and abundant genera across larval gut microbiomes.
Genus	Prevalence (%)	Abundance Mean (%)	Abundance SD (%)
Morganella	100	24.54	24.58
Providencia	100	14.53	16.56
Lactobacillus	95.83	13.09	11.05
Enterococcus	100	10.93	6.95
Proteus	100	9.25	9.92
Pseudomonas	54.1667	5.2	8.38
Sphingobacterium	37.5	4.49	12.2
Klebsiella	100	3.44	5.46
Acinetobacter	45.8333	2.12	4.96
Clostridium	95.8333	1.82	3.21
Actinomyces	66.6667	1.59	2.24
Citrobacter	79.1667	1.12	1.71
Ignatzschineria	37.5	0.955	1.83
Veillonella	29.1667	0.908	2.14
Frischella	12.5	0.862	2.63
Chryseobacterium	25	0.625	1.79
[Ruminococcus]	41.6667	0.592	1.63
Alcaligenes	29.1667	0.214	1.03
Genera with ≥ 5% abundance in at least one sample are listed, with prevalence and mean abundance measures considered across the entire microbiome dataset. SD - standard deviation.
