# Supplementary material for: Feed and Host Genetics Drive Microbiome Diversity with Resultant Consequences for Production Traits in Mass-Reared Black Soldier Fly (Hermetia illucens) Larvae
Source: Insects. 2021 Dec 1;12(12):1082. doi: 10.3390/insects12121082 (PMC8706267; doi:10.3390/insects12121082)
Supplement: Supplementary file 1 [file insects-12-01082-s001.zip › Suppl Files/Table S5.xlsx]

## Sheet: Table S5
Table S5. Larval gut metabolic features with significant (FDR-adjusted P-value < 0.05) differentiation by feed type.
Name	P	FDR
Atrazine metabolism	0.0014446	0.013359
Streptomycin producer	0.0023123	0.013359
Acid producing	0.0030635	0.013359
Ammonia oxidizer	0.0033121	0.013359
Xylan degrader	0.0033225	0.013359
Chitin degradation	0.0043978	0.013359
Selenate reducer	0.0044529	0.013359
Dehalogenation	0.0072027	0.018907
Nitrogen fixation	0.011981	0.025945
Degrades aromatic hydrocarbons	0.012355	0.025945
Gramicidin producer	0.03376	0.054536
Naphthalene degrading	0.03376	0.054536
Sulfur reducer	0.03376	0.054536
Sulfate reducer	0.038314	0.057471
Chlorophenol degrading	0.043596	0.061034
Nitrite reducer	0.048413	0.063542
Significance is considered at an α = 0.05 threshold.
