# Supplementary material for: Feed and Host Genetics Drive Microbiome Diversity with Resultant Consequences for Production Traits in Mass-Reared Black Soldier Fly (Hermetia illucens) Larvae
Source: Insects. 2021 Dec 1;12(12):1082. doi: 10.3390/insects12121082 (PMC8706267; doi:10.3390/insects12121082)
Supplement: Supplementary file 1 [file insects-12-01082-s001.zip › Suppl Files/Table S6.xlsx]

## Sheet: Table S6
Table S6. Host genetic background is retained as a driver of microbiome structure upon exclusion of the Citrobacter genus.
Data Partition	df	SS	R2	Pseudo-F	P
Background (G)	1	0.357	0.07	2.729	0.02
Feed (E)	3	1.714	0.377	4.882	< 0.001
Background*Feed (GxE)	3	0.637	0.14	1.812	0.036
Residual	16	1.872	0.412
Total	23	4.58	1
Permutational multivariate analysis of variance (PERMANOVA; 999 permutations) performed on a genus-level Bray-Curtis matrix of larvae microbiome data. df – degrees of freedom; SS – model sum of squares. Statistical significance is considered at an α = 0.05 threshold.
