# Supplementary figures and images for: Feed and Host Genetics Drive Microbiome Diversity with Resultant Consequences for Production Traits in Mass-Reared Black Soldier Fly (Hermetia illucens) Larvae
Source: MDPI journal article supplement (doi:10.3390/insects12121082), 2021-12-01

Diet | Microbiome (64.3%)

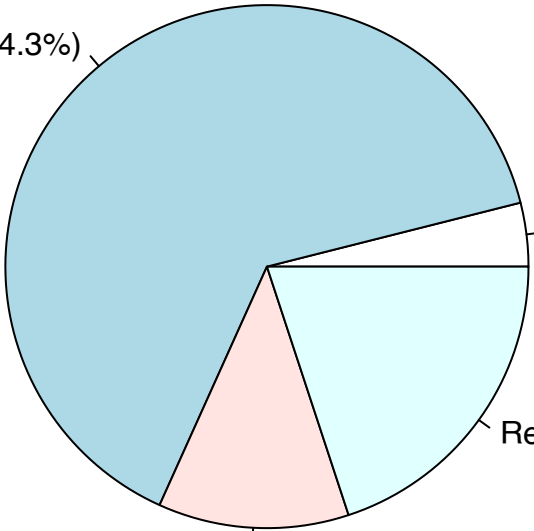

Microbiome (3.9%)

Residual (19.9%)

Diet (11.8%)

Supplement: s1 [file s1]

**A**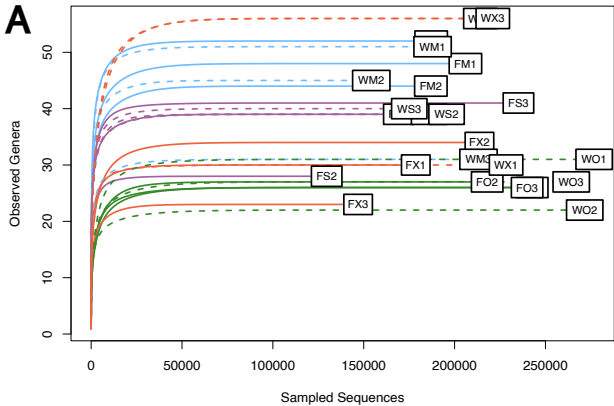**B**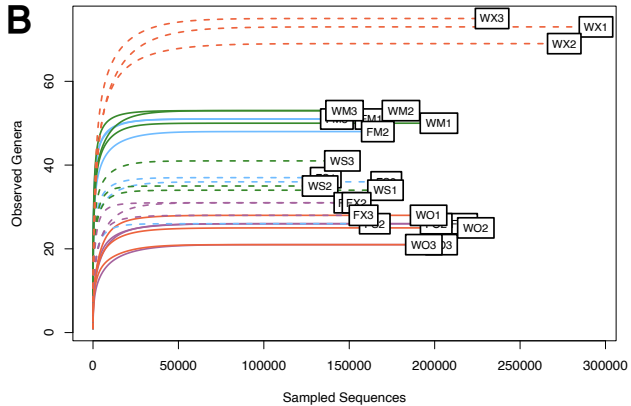

Supplement: s1 [file s1]

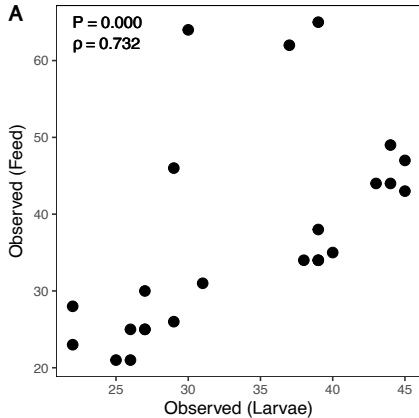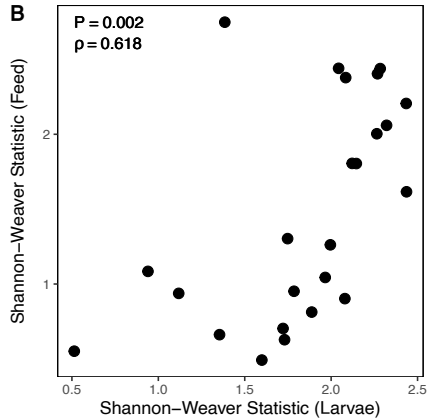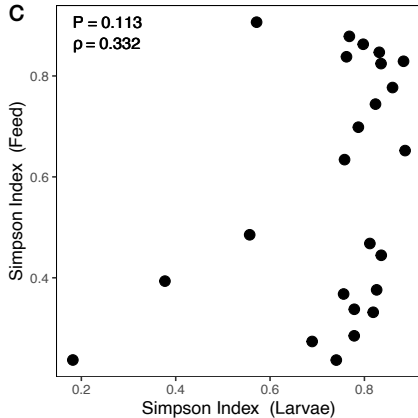

Supplement: s1 [file s1]

# Background

● Factory ▲ Wild

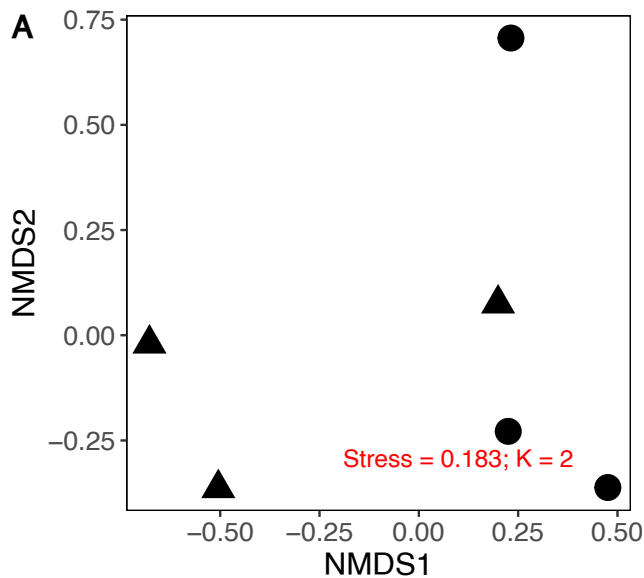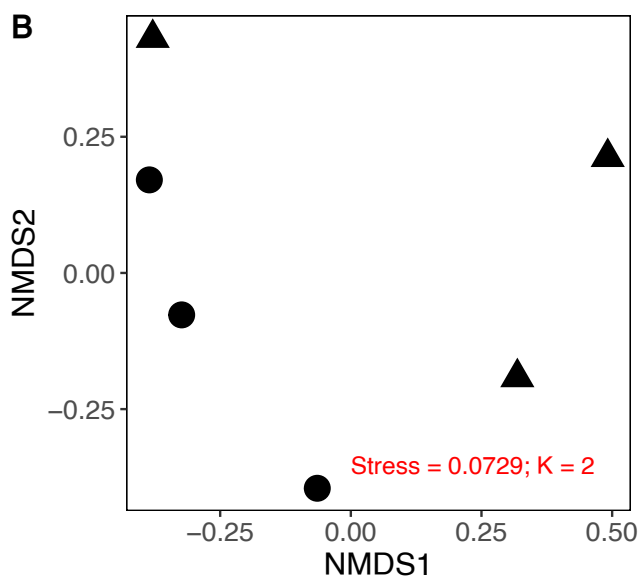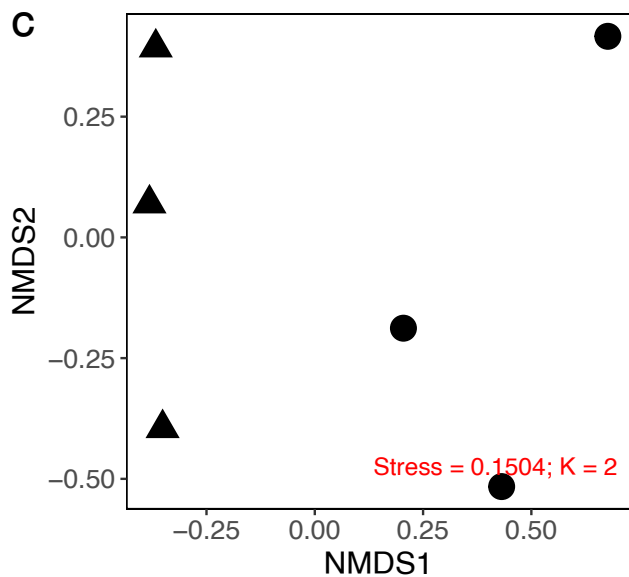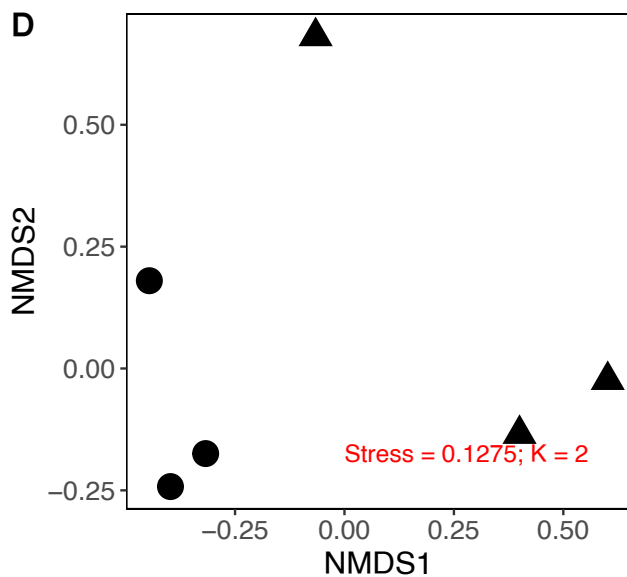

Supplement: s1 [file s1]

$-\log(\text{FDR-adjusted } P)$

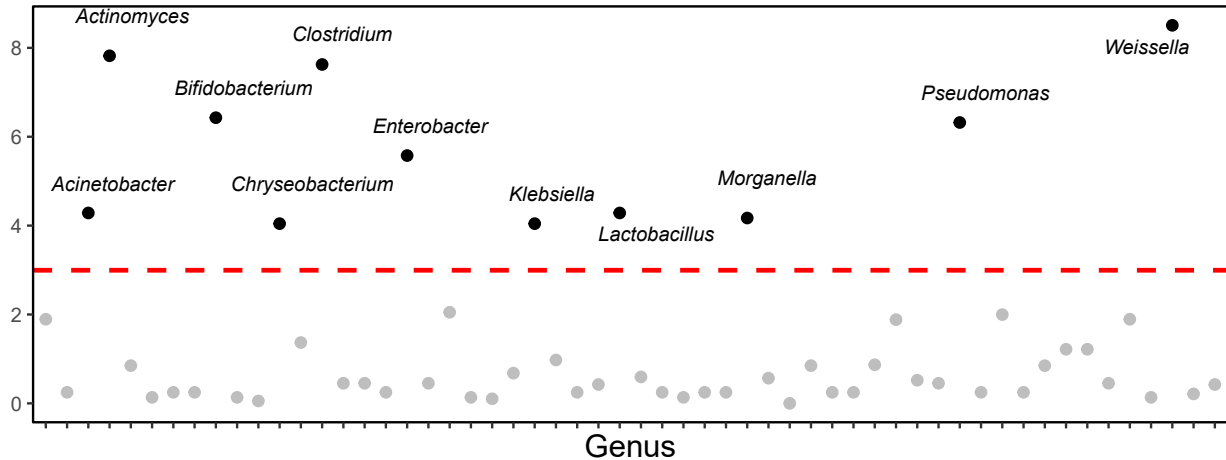

Supplement: s1 [file s1]
